# Supplementary material for: Theoretical calculation and experiment study on the electronic structure, microstructures and photocatalytic activity of N–Al codoped TiO2
Source: Royal Society of Chemistry journal article supplement (doi:10.1039/c7ra07815c), 2017-01-01
Supplement: c7ra07815c1.pdf [file c7ra07815c1.pdf]

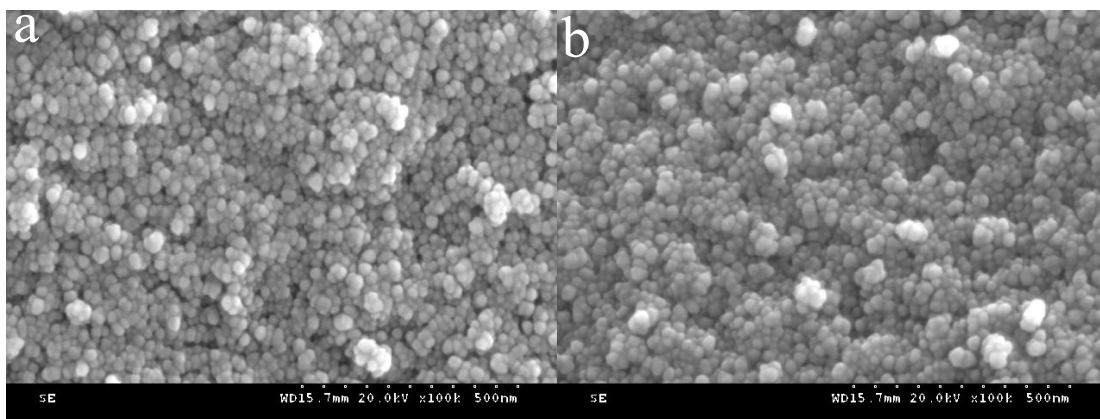

Fig. S1 SEM of N-TiO<sub>2</sub> (a) and Al-TiO<sub>2</sub> (b)

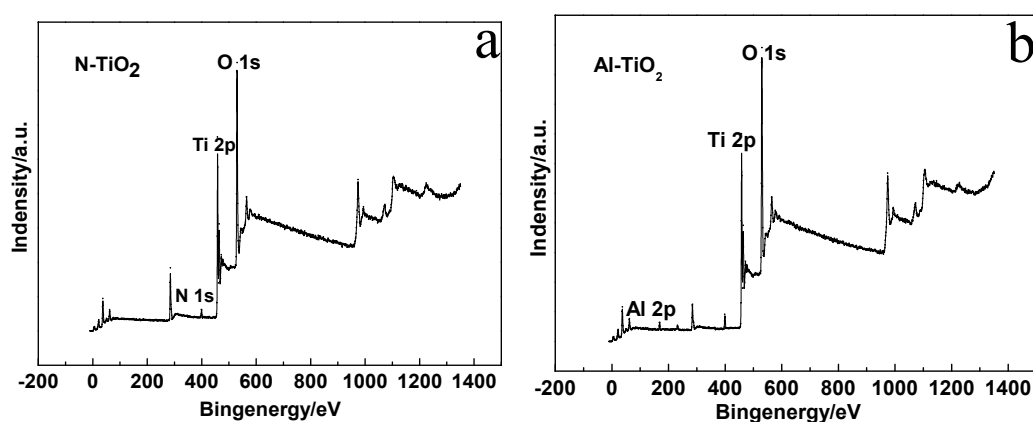

Fig. S2 XPS survey spectrum of N-TiO<sub>2</sub> (a) and Al-TiO<sub>2</sub> (b)
